# Supplementary material for: Emission and surface properties of main-chain type polybenzoxazine with pyridinyl moieties
Source: Royal Society of Chemistry journal article supplement (doi:10.1039/c3ra46854b), 2014-01-01
Supplement: c3ra46854b.pdf [file c3ra46854b.pdf]

## Supporting Information

# Emission and surface properties of main-chain type polybenzoxazine with pyridinyl moieties

Ching Hsuan Lin,<sup>\*a</sup> Yu Sin Shih,<sup>a</sup> Meng Wei Wang,<sup>a</sup> Chun Yu Tseng,<sup>a</sup> Tzong Yuan Juang,<sup>b</sup> Chih

Feng Wang<sup>\*c</sup>

<sup>a</sup>Department of Chemical Engineering, National Chung Hsing University, Taichung, Taiwan

<sup>b</sup>Department of Applied Chemistry, National Chiayi University, Chiayi, Taiwan

<sup>c</sup>Department of Materials Science and Engineering, I-Shou University, Kaohsiung, Taiwan

**Preparation of diamine (2).** Diamine (**2**) was prepared by a two-step procedure ([Scheme 1](#)).<sup>1</sup> In the first step, benzaldehyde 3.20 g (0.03 mole), p-nitroacetophenone 10.00 g (0.06 mole), and ammonium acetate 30.00 g (0.39 mole), and glacial acetic acid 75 mL were introduced into a round-bottom 250 mL glass flask equipped with a nitrogen inlet, a condenser, and a magnetic stirrer. The reaction mixture was stirred at reflux for 12 h. The precipitate was filtered and washed with 50% acetic acid solution and then with ethanol. After drying in a vacuum oven, deep yellow powder (**1**) with 67% yield was obtained. In the second step, (**1**) 10.00 g (0.024 mole), palladium on carbon 10 % (0.40 g), and ethanol 400 mL were introduced into a round-bottom 500 mL glass flask equipped with a nitrogen inlet, a condenser, and a magnetic stirrer. The reaction mixture was warmed to 80 °C. Hydrazine hydrate 80% (20 mL) in ethanol (40 mL) was added dropwise over a 2

h period through the dropping funnel, and stirred constantly for another 12 h. The solution was filtered, and the filtrate was cooled slowly to room temperature. Yellow crystal (**2**) with 90% yield was obtained after filtering and vacuum drying at 100 °C. <sup>1</sup>H-NMR (ppm,DMSO-*d*<sub>6</sub>), δ=5.42 (4H, NH<sub>2</sub>), 6.72 (4H, H<sup>2</sup>), 7.48 (1H, H<sup>11</sup>), 7.54 (2H, H<sup>10</sup>), 7.81 (2H, H<sup>6</sup>), 7.94 (2H, H<sup>9</sup>), 8.04 (4H, H<sup>3</sup>).  
Melting point from DSC thermogram: 200.8 °C. Melting enthalpy 88.6 J/g.

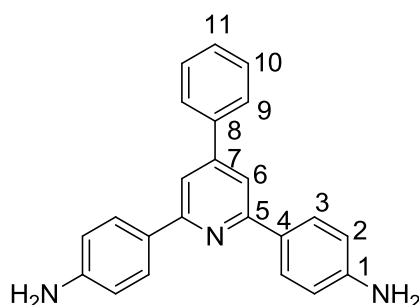

**Preparation of diamine (5).** Diamine (**5**) was prepared by a three-step procedure (Scheme S1).<sup>25</sup> In the first step, benzaldehyde 5.00 g (47.12 mmol), 4-nitroacetophenone (15.56 g, 94.23 mmol), and toluene (30 mL) were introduced into a round-bottom 150 mL glass flask equipped with a nitrogen inlet, a condenser, and a magnetic stirrer. Boron trifluoride etherate 14.20 mL (113.09 mmol) diluted with toluene (5 mL) was added dropwise over a 1 h period through a dropping funnel. The mixture was stirred at reflux for 3 h. The dark solution obtained was concentrated by a rotary evaporator, and the residue was washed with 1,4-dioxane and then with ether. After vacuum dried at 105 °C, 2,6-bis(4-nitrophenyl)-4-phenylpyrylium tetrafluoroborate (**3**) with 63% yield was obtained. In the second step, (**3**) 11.00 g (23.51 mmol), sodium acetate 3.86 g, (47.02 mmol), and acetic anhydride 40 mL) introduced into a round-bottom 150 mL glass flask equipped with a nitrogen inlet, a condenser,

and a magnetic stirrer. The mixture was refluxed for 12 h. The resulting solution was subsequently cooled at -10 °C for several hours. The precipitate was filtered and washed with methanol. After being vacuum dried at 105 °C, 4,4-dinitro-5-phenyl-*m*-terphenyl (**4**) with 70% yield was obtained. In the third step, (**4**) 7.00 g (0.016 mole), palladium on carbon 10% (0.28 g), and ethanol 20 mL were introduced into a round-bottom 150 mL glass flask equipped with a nitrogen inlet, a condenser, and a magnetic stirrer. The reaction mixture was warmed to 80 °C. Hydrazine hydrate 80% (8 mL) in ethanol (16 mL) was added dropwise over a 2 h period through the dropping funnel, and kept stirred for another 12 h. The solution was filtered, and the filtrate was cooled slowly to room temperature. Brown crystal (**5**) with 85% yield was obtained after being filtered and vacuum dried at 100 °C. <sup>1</sup>H-NMR (ppm, DMSO-*d*<sub>6</sub>) δ=5.2 (4H, NH<sub>2</sub>), 6.7 (4H, H<sup>2</sup>), 7.4-7.5 (7H, H<sup>3,10,11</sup>), 7.5-7.8 (5H, H<sup>6,9,12</sup>). Melting point from DSC thermogram: 229.3 °C. Melting enthalpy 77.5 J/g.

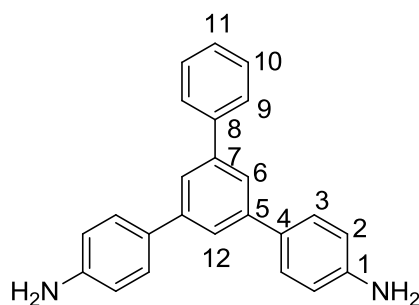

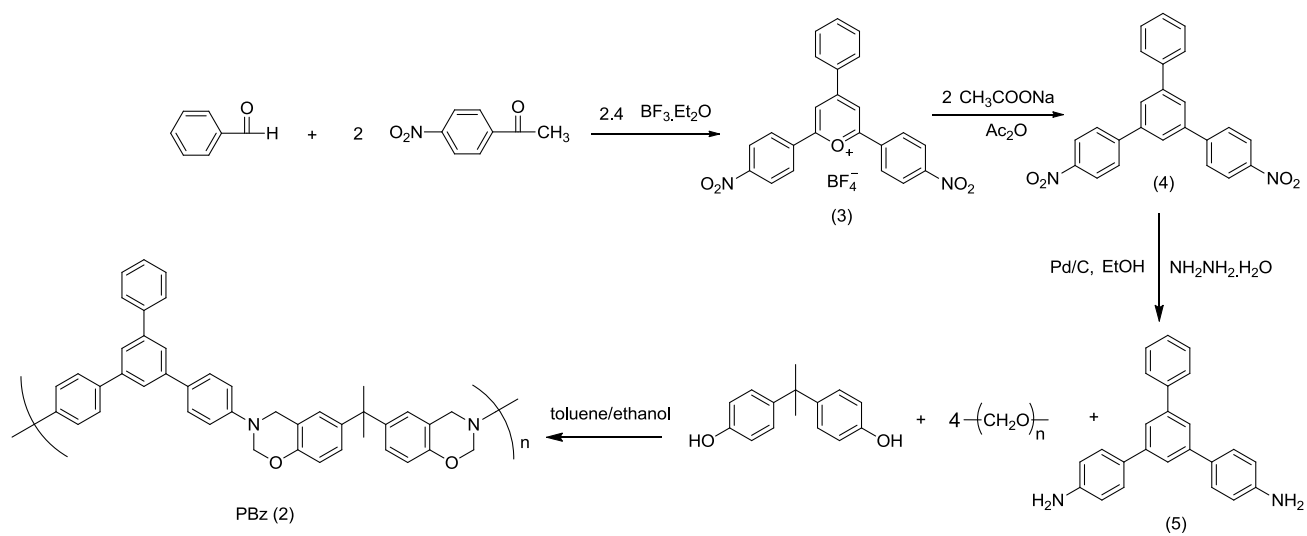

**Scheme S1. Synthesis of PBz (2)**

**Table S1.** Solvent effects on PBz (1) and PBz (2) synthesis

| Run | Sample ID | Temp (°C) | Time (hr) | Solvent               | Reaction Status                                  |
|-----|-----------|-----------|-----------|-----------------------|--------------------------------------------------|
| 1   | PBz (1)   | 80        | 24        | 1,4-dioxane           | A lot of gelatin                                 |
| 2   | PBz (1)   | 60        | 24        | chloroform            | A lot of gelatin                                 |
| 3   | PBz (1)   | 80        | 24        | xylene                | A lot of gelatin                                 |
| 4   | PBz (1)   | 80        | 24        | toluene               | A lot of gelatin                                 |
| 5   | PBz (1)   | 80        | 24        | toluene/ethanol (2/1) | Precipitate in slurry form during polymerization |
| 6   | PBz (1)   | 80        | 24        | toluene/ethanol (1/1) | Homogeneous with high yield (82%)                |
| 7   | PBz (1)   | 80        | 24        | toluene/ethanol (1/2) | Homogeneous but low yield (less than 40%)        |
| 8   | PBz (2)   | 60        | 24        | chloroform            | Powder precipitation during polymerization       |
| 9   | PBz (2)   | 80        | 24        | toluene/ethanol (2/1) | Powder precipitation during polymerization       |
| 10  | PBz (2)   | 80        | 24        | toluene/ethanol (1/1) | Powder precipitation during polymerization       |

**Table S2.** Solubility data of PBz (1) and PBz (2)<sup>a</sup>

| Sample ID | Solvent |                     |         |                                 |                   |     |         |        |
|-----------|---------|---------------------|---------|---------------------------------|-------------------|-----|---------|--------|
|           | NMP     | DMAc<br>DMF<br>DMSO | Dioxane | CH <sub>2</sub> Cl <sub>2</sub> | CHCl <sub>3</sub> | THF | Toluene | Xylene |
| PBz (1)   | +       | +                   | +       | ±                               | +h                | +   | ±       | ±      |
| PBz (2)   | +h      | ±                   | -       | ±                               | ±                 | ±   | -       | -      |

<sup>a</sup> Solubility was tested with a 10 mg sample in 1 mL of solvent.

+, soluble; +h, soluble on heating; ±, partially soluble on heating; -, insoluble on heating.

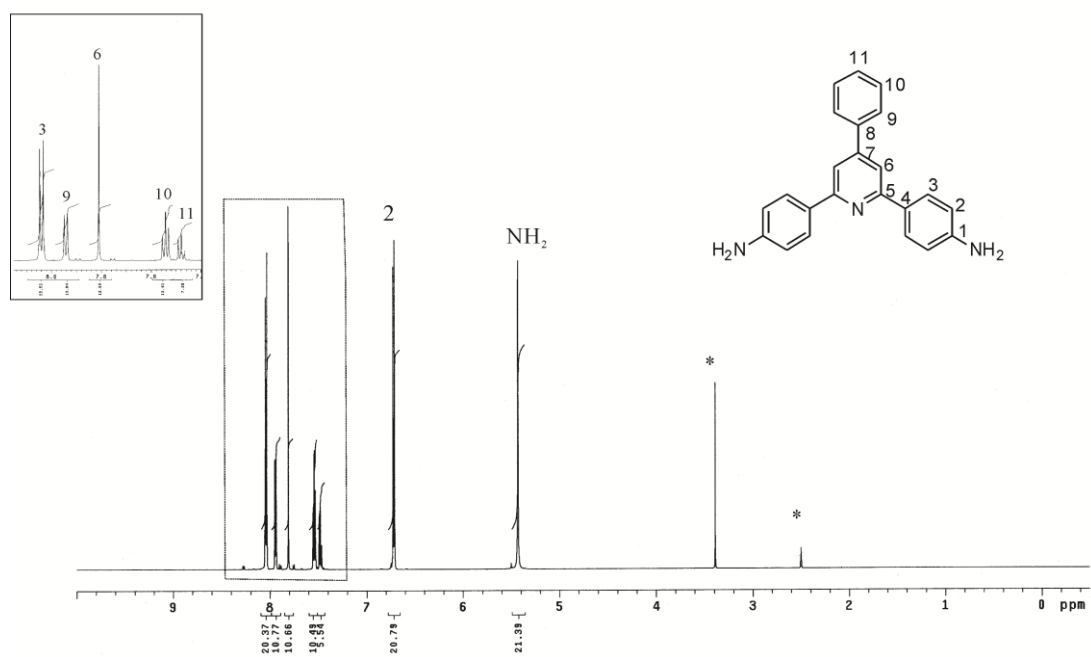

**Figure S1.** <sup>1</sup>H NMR spectrum of (2) in DMSO-*d*<sub>6</sub>.

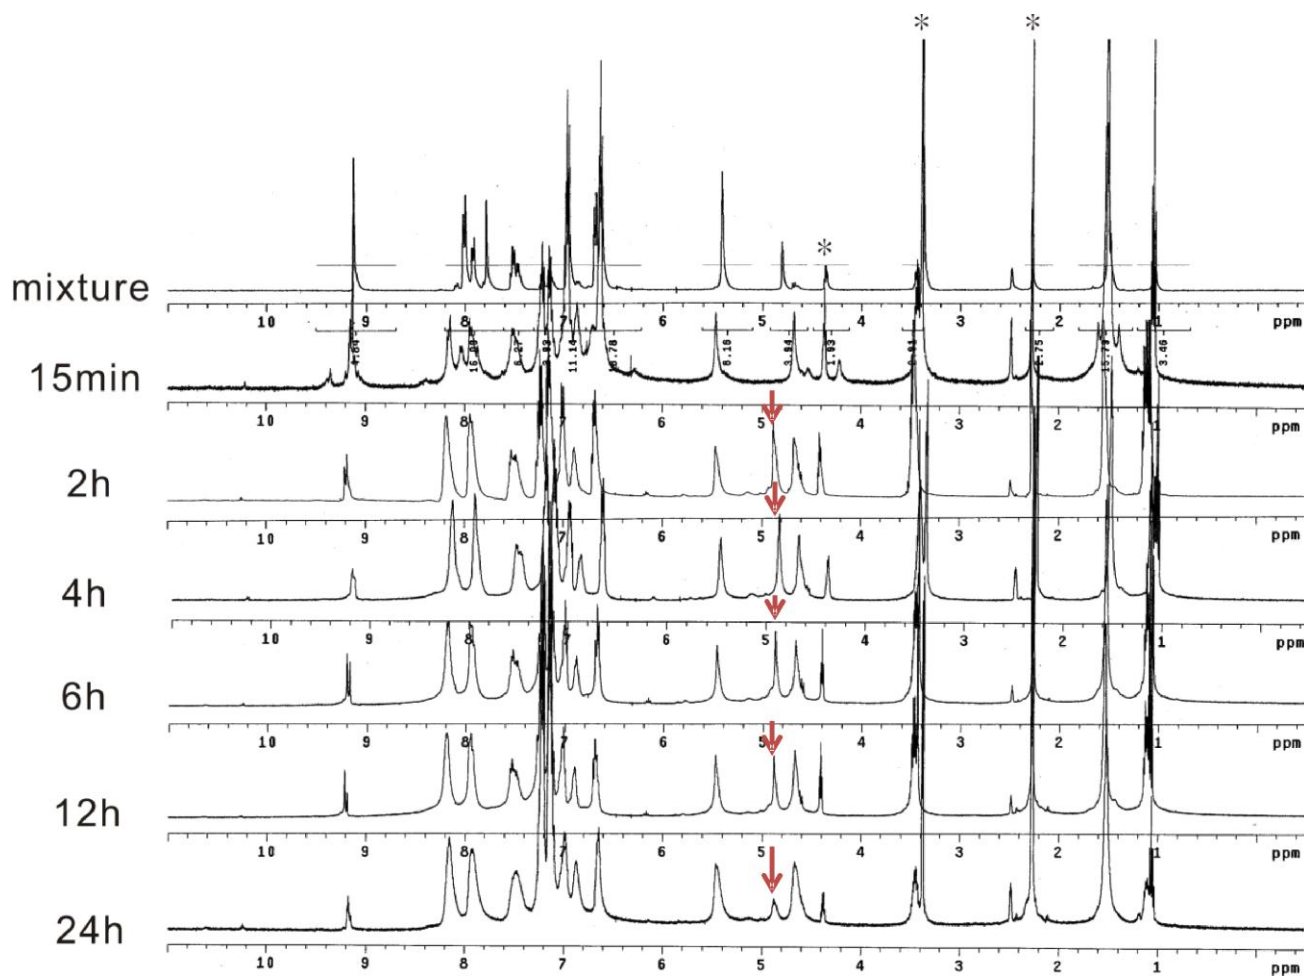

**Figure S2.** <sup>1</sup>H NMR spectra of vacuum-dried reaction mixture at various reaction time for PBz (**1**) synthesized in Run 5. Note that the triazine peak (4.88 ppm) did not disappear completely after 24 h.



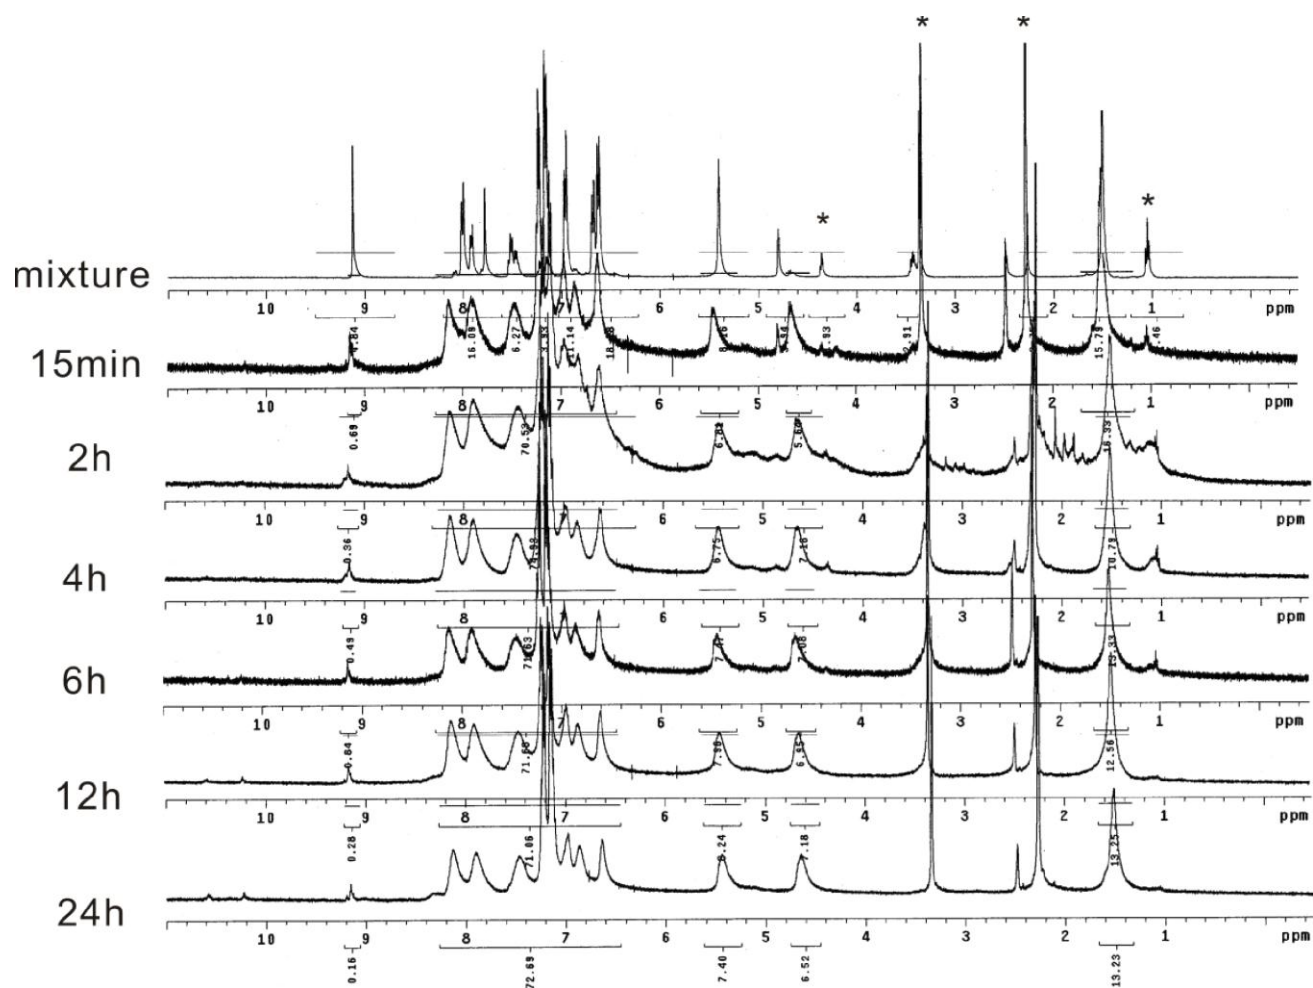

**Figure S3.** <sup>1</sup>H NMR spectra of vacuum-dried reaction mixture at various reaction time for PBz (**1**) synthesized in Run 6. Note that no triazine peak was observed during the synthesis.

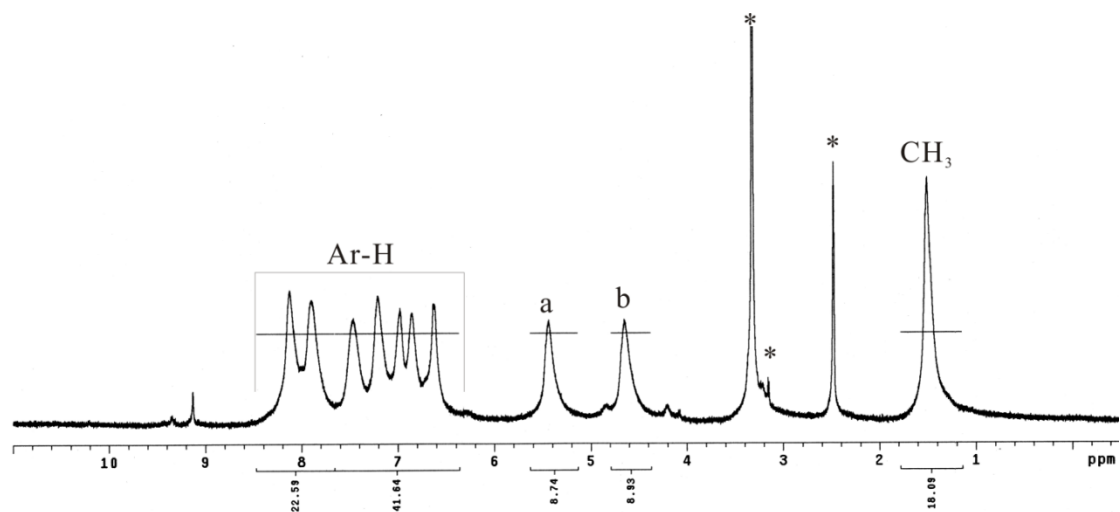

**Figure S4.**  $^1\text{H}$  NMR spectrum of (a) PBz (**1**) in  $\text{DMSO-}d_6$ .

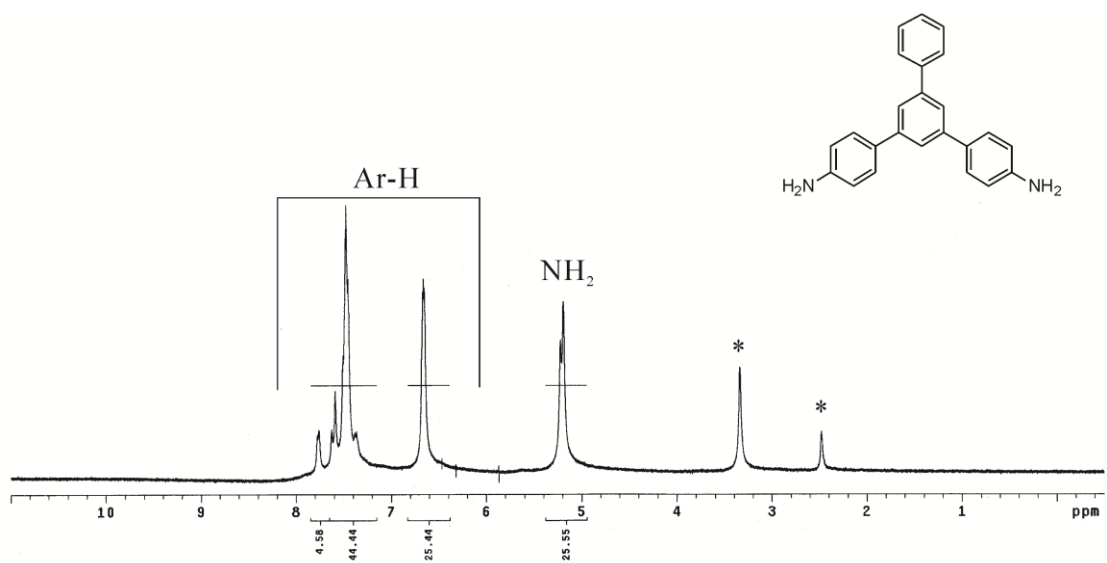

**Figure S5.** <sup>1</sup>H NMR spectrum of (5) in DMSO-*d*<sub>6</sub>.

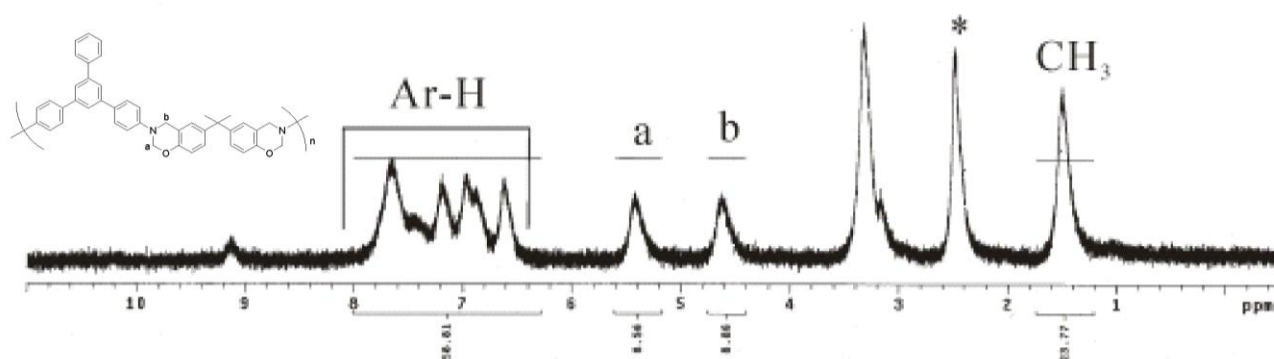

**Figure S6.** <sup>1</sup>H NMR spectrum of (a) PBz (2) in DMSO-*d*<sub>6</sub>. Note that the early precipitation lowers the purity of PBz (2).

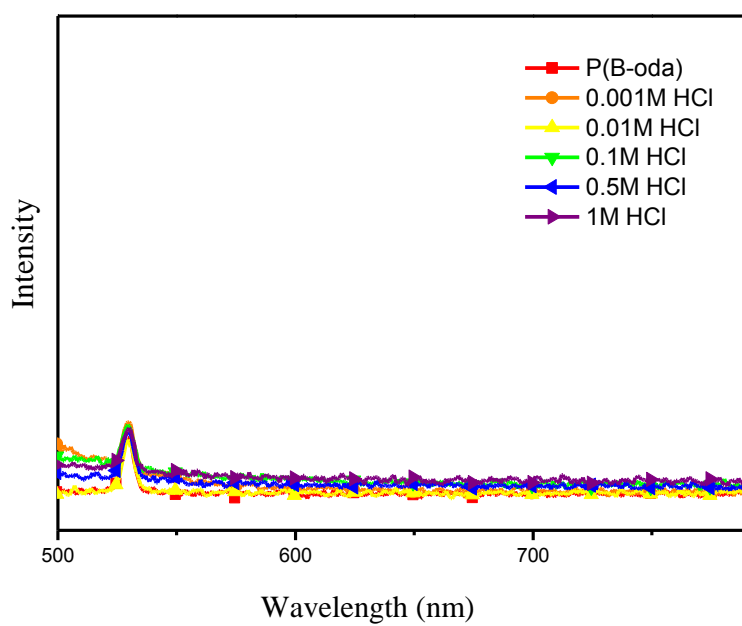

**Figure S7.** Emission spectra of THF dilute solution of P(B-oda) and protonated PBz (B-oda) after being excited at 458 nm.

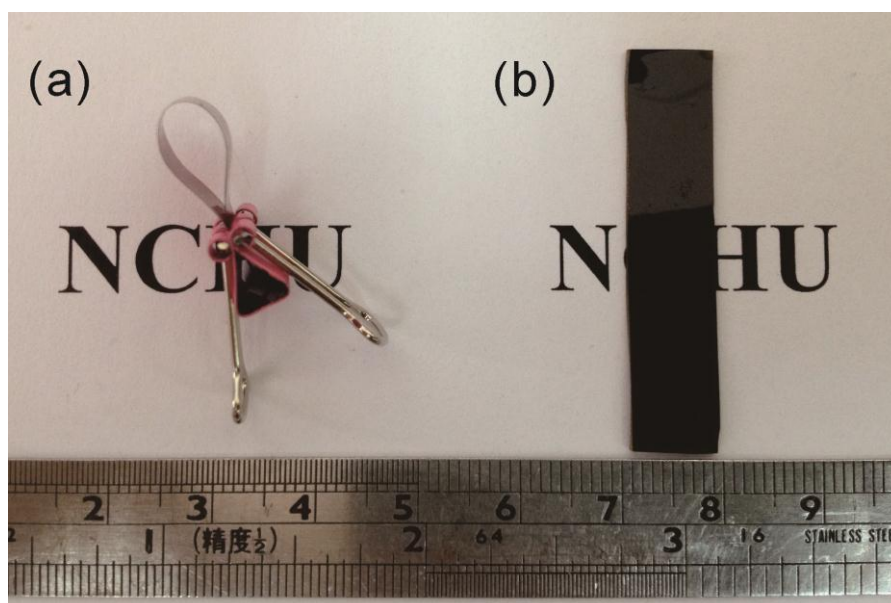

**Figure S8.** A photo of PBz (1)-T at a thickness of (a) 60 μm (b) 550 μm

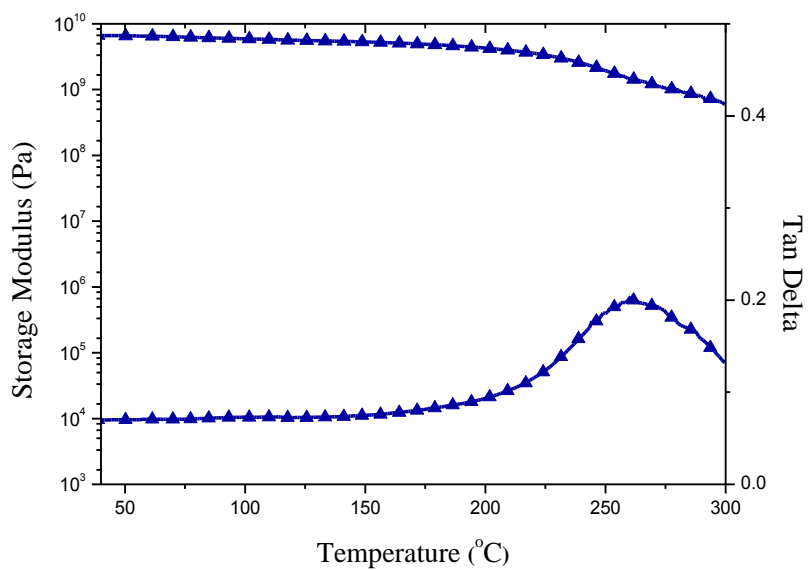

**Figure S9.** DMA thermogram of PBz (1)-T.

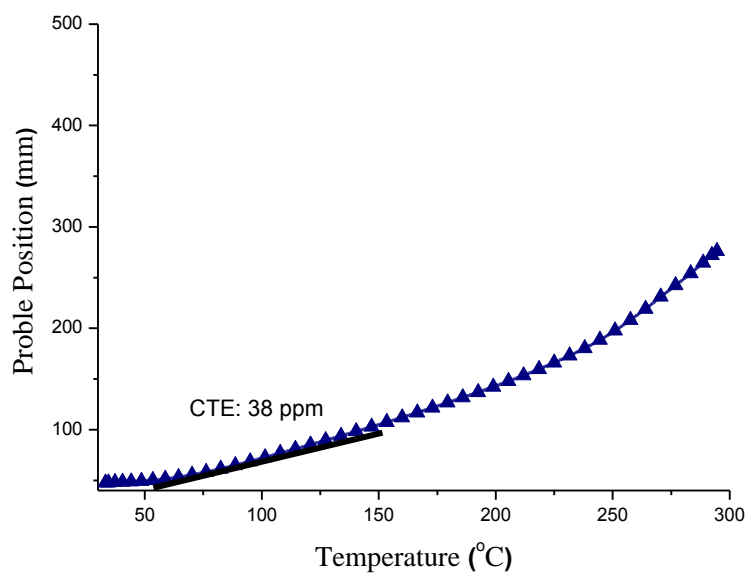

**Figure S10.** TMA curve of PBz (1)-T

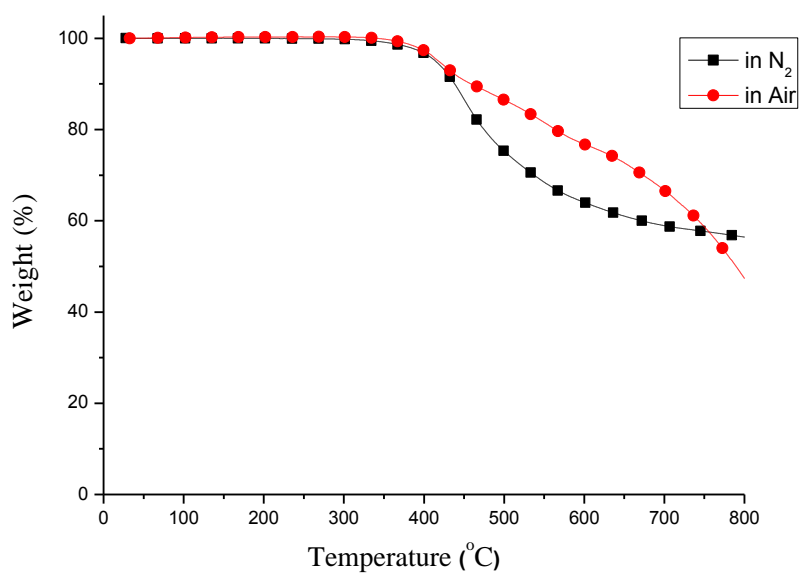

**Figure S11.** TGA thermograms of PBz (1)-T in N<sub>2</sub> and air.
